# Supplementary material for: CyNetSVM: A Cytoscape App for Cancer Biomarker Identification Using Network Constrained Support Vector Machines
Source: PubMed Central journal article supplement (PMC5266326; doi:10.1371/journal.pone.0170482), 2017-01-25

**S2 Fig. The class diagram of the CyNetSVM bundle application**

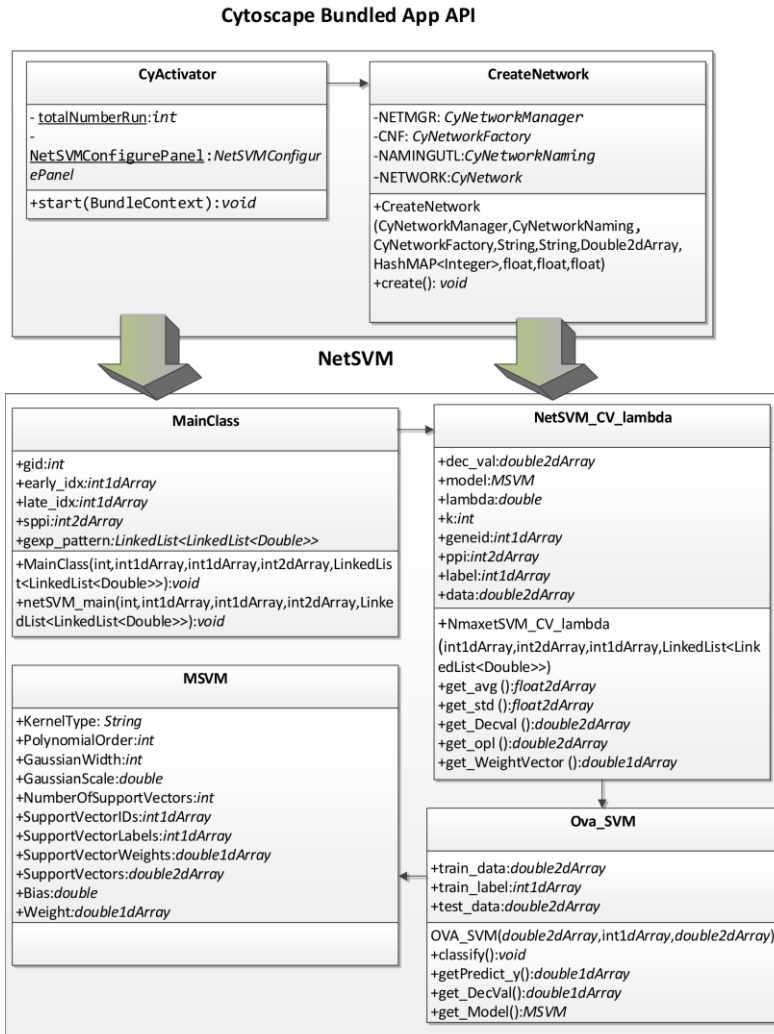

Supplement: pone.0170482.s002.pdf [file pone.0170482.s002.pdf]
